# Supplementary material
Source: ML conference proceedings conference paper supplement (https://aclanthology.org/2023.trustnlp-1.6)

## Step 1: Generate Candidate Summaries

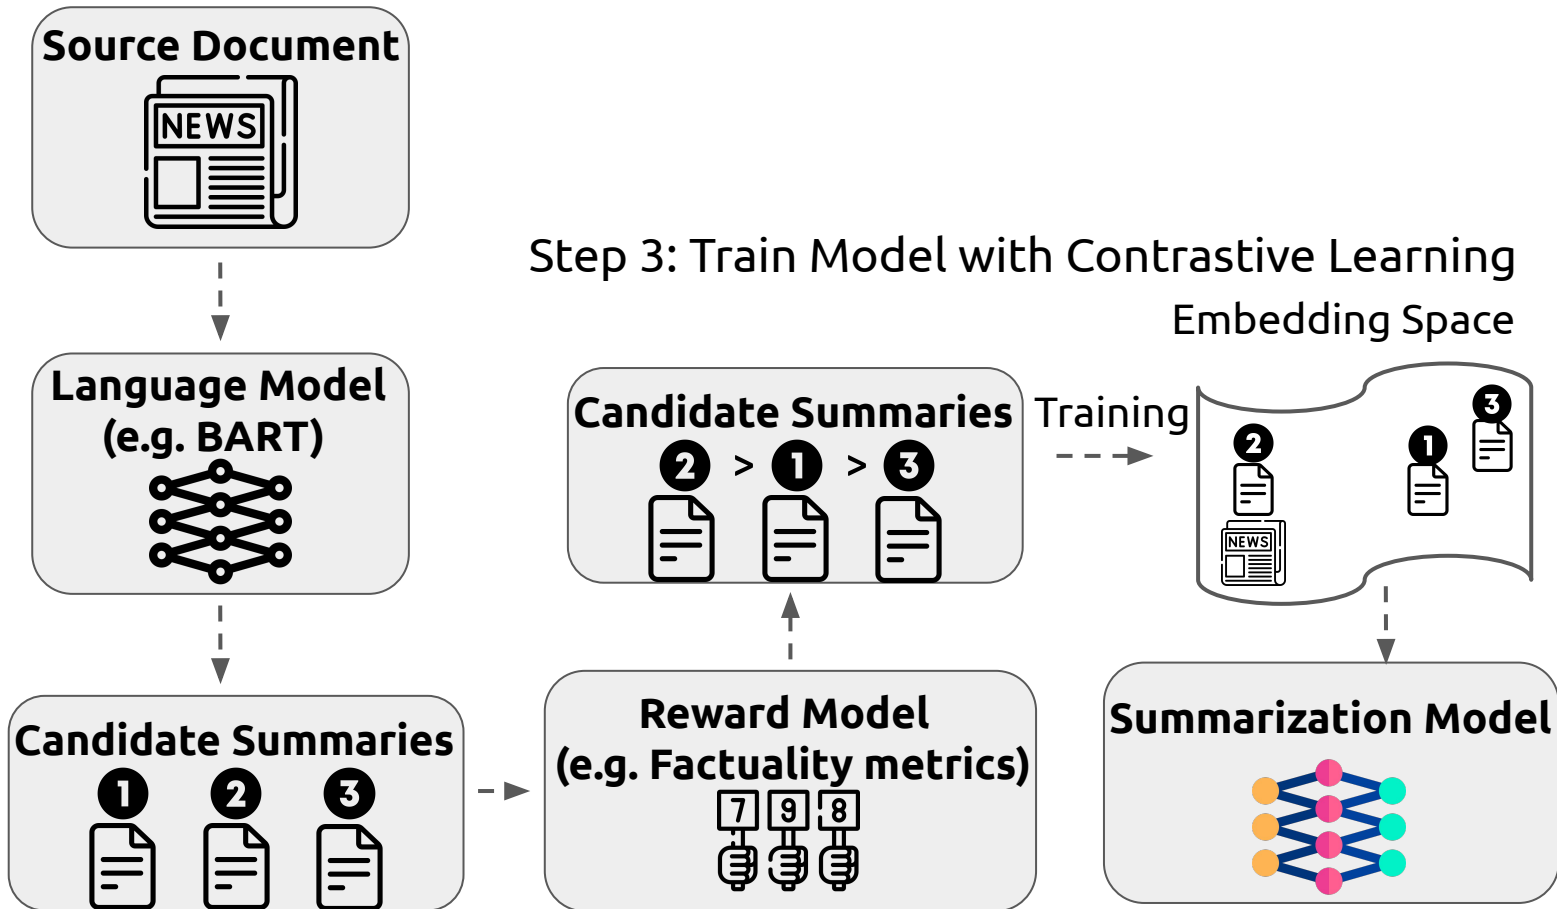

## Step 2: Rank Candidate Summaries

Supplement: SupplementaryMaterial [file CRL_diagram.pdf › CRL_diagram.pdf]

## Step 1: Generate Candidate Summaries

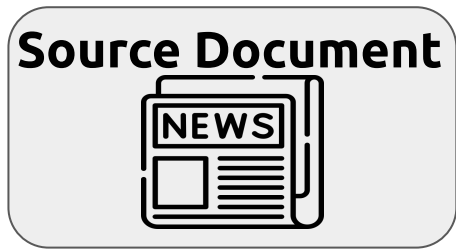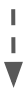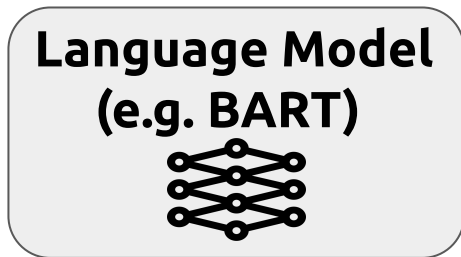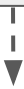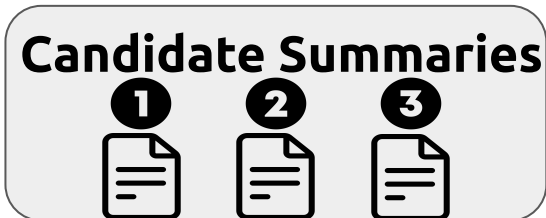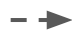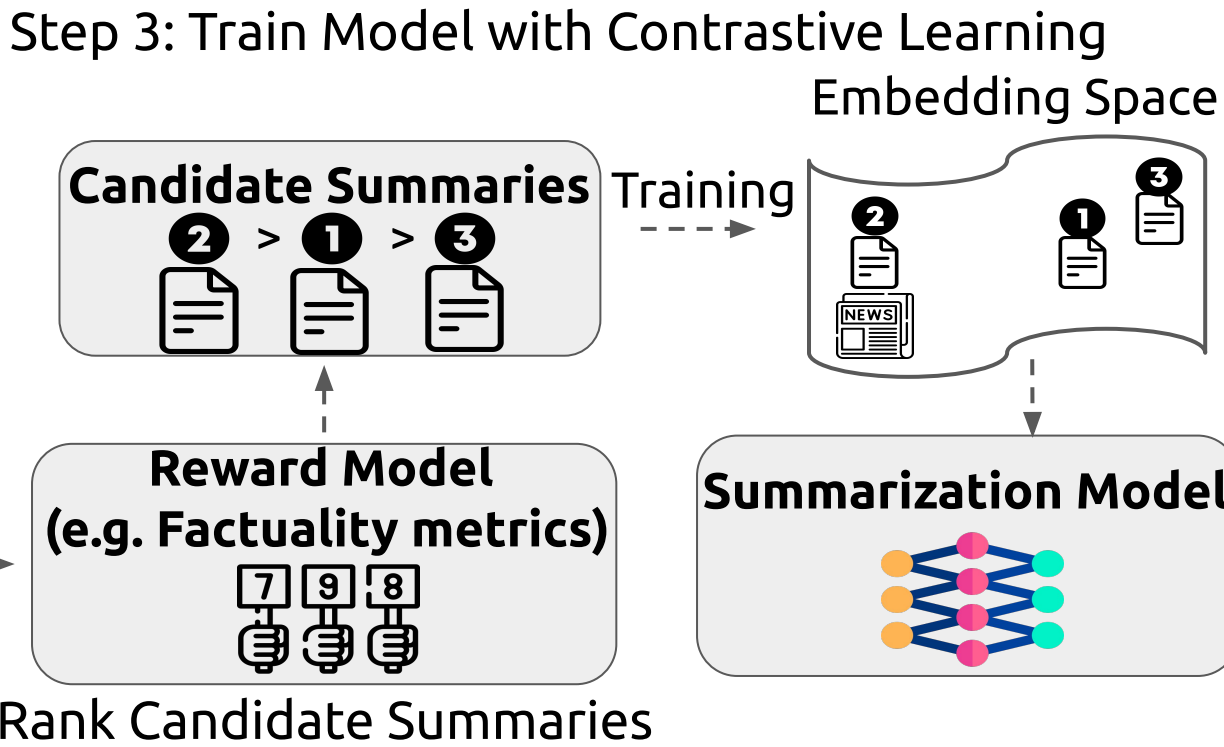

## Step 2: Rank Candidate Summaries

Supplement: SupplementaryMaterial [file CRL_diagram_2.pdf › CRL_diagram_2.pdf]
